# Supplementary material for: Metabolite accumulation contributes to differences in seed germination of water-saving and drought-resistance rice under dry direct seeding
Source: Research Square preprint supplement (doi:10.21203/rs.3.rs-6261444/v1), 2025-04-04
Supplement: Supplementary file 1 [file a2ddea6c4546842a8ca7f7f1.docx]

**Supplementary data**

**Table S 1 Varieties of materials used in the experiment.**

| No. | Rice varieties |
| --- | --- |
| V1 | N Liangyou 018 |
| V2 | Y Liangyou 828 |
| V3 | Y Liangyou 900 |
| V4 | Chuangliangyouhuazhan |
| V5 | Guangliangyou 1813 |
| V6 | Hanyou 3015 |
| V7 | Hanyou 73 |
| V8 | Heliangyou 332 |
| V9 | Huanghuazhan |
| V10 | Huiliangyou 8061 |
| V11 | Huiliangyousimiao |
| V12 | Huiliangyouxiangsimiao |
| V13 | Jingliangyou 1377 |
| V14 | Jingliangyou 534 |
| V15 | Kenliangyou 801 |
| V16 | Jingliangyouhuanglizhan |
| V17 | Liangyou 566 |
| V18 | Longliangyou 7810 |
| V19 | Longliangyou 800 |
| V20 | Qianliangyou No.8 |
